# Supplementary material
Source: Springer Nature journal article supplement (https://www.springermedizin.de/resource/supplementary/12885_2011_2922_MOESM1_ESM.pdf/9462238)
Supplement: MOESM1 [file 9462238]

Potentially relevant citations  
identified and screened for retrieval:  
N = 4197 citations

Citations rejected at title or  
abstract stage:  
N = 4177 citations

Full texts reviewed:  
N = 20 citations

Citations rejected at full  
text stage:  
N = 16 citations

Additional studies identified since previous reviews:  
N = 4 citations relating to 5 studies:

- Pegfilgrastim vs. no primary G-CSF: 4 additional RCTs (within 3 citations)
- Filgrastim vs. no primary G-CSF: 1 additional RCT (1 citation)

Studies included from previous reviews:  
N = 19 citations relating to 20 studies

Total full papers included, from updated search and previous reviews:  
N = 23 citations relating to 25 studies:

- Pegfilgrastim vs. no primary G-CSF: 5 RCTs (within 4 citations)
- Filgrastim vs. no primary G-CSF: 10 RCTs (within 9 citations)
- Lenograstim vs. no primary G-CSF: 5 RCTs
- Pegfilgrastim vs. filgrastim: 5 RCTs
- Pegfilgrastim vs. lenograstim: 0 RCTs
- Lenograstim vs. filgrastim: 0 RCTs
